1

2 **Evaluation of biodiversity metrics through environmental DNA metabarcoding**  
3 **compared with visual and capture surveys in river fish community**

4

5 Hideyuki Doi<sup>1,\*†</sup>, Ryutei Inui<sup>2,3\*,†</sup>, Shunsuke Matsuoka<sup>1,†</sup>, Yoshihisa Akamatsu<sup>2</sup>,  
6 Masuji Goto<sup>2</sup>, and Takanori Kono<sup>2</sup>

7

8 <sup>1</sup> Graduate School of Simulation Studies, University of Hyogo, 7-1-28 Minatojima  
9 Minami-machi, Chuo-ku, Kobe, 650-0047, Japan

10 <sup>2</sup> Graduate School of Science and Engineering, Yamaguchi University, 2-16-1  
11 Tokiwadai, Ube, Yamaguchi, 755-8611, Japan

12 <sup>3</sup> Faculty of Socio-Environmental Studies, Fukuoka Institute of Technology, 3-30-1  
13 Wajiro-higashi, Higashi-ku, Fukuoka, 811-0295, Japan

14 †These authors equally contributed to this study.

15

16 \*Corresponding authors:

17 Hideyuki Doi (hideyuki.doi@icloud.com)

18 Ryutei Inui (inuiryutei@gmail.com)

19

20

21 Running head: eDNA metabarcoding for fish diversity

22

23

24

25 **Abstract**

26

27 1. Information on alpha (local), beta (between habitats), and gamma (regional) diversity  
28 is fundamental to understanding biodiversity as well as the function and stability of  
29 community dynamics. The methods like environmental DNA (eDNA) metabarcoding  
30 are currently considered useful to investigate biodiversity.

31

32 2. We compared the performance of eDNA metabarcoding with visual and capture  
33 surveys in estimating alpha/gamma diversity and the variation of the community  
34 assemblages of river fish communities, particularly considering community nestedness  
35 and turnover.

36

37 3. In five rivers across west Japan, with comparing to visual/capture surveys, eDNA  
38 metabarcoding detected more species in the study sites, consequently the overall  
39 number of species in the region (i.e., gamma diversity) was higher. In particular, the  
40 species found by visual/capture surveys were encompassed by those by eDNA  
41 metabarcoding.

42

43 4. With analyzing the community assemblages between the rivers, we showed the  
44 different results between the both methods. While, in the same river, the nestedness and  
45 species turnover changing from upstream to downstream did not significantly differ  
46 between the both methods. Our results suggest that eDNA metabarcoding may be

47 suitable method, especially for understanding regional community patterns, for fish

48 monitoring in rivers.

49

50 Key words: eDNA, community, river, alpha and gamma diversity, nestedness

51

52

53

## 54 **Introduction**

55

56 The maintenance of biodiversity underpins the stability of ecosystem processes in  
57 constantly changing environments (Primack, 1993; Margules & Pressey, 2000; Pecl et  
58 al., 2017). Moreover, biodiversity loss affects ecosystem functions and services and,  
59 consequently, human society (Primack 1993; Margules & Pressey, 2000, Pecl et al.  
60 2017). Ecologists have made efforts to conserve biodiversity based on essential  
61 biodiversity survey methods, e.g., species richness and distribution (Primack, 1993;  
62 Margules & Pressey, 2000, Doi & Takahara, 2016, Pecl et al., 2017). Biodiversity can  
63 be evaluated in different levels: e.g., by estimating alpha (local), beta (between  
64 habitats), and gamma (regional) diversity and the variation of the community  
65 assemblages. To conserve local communities, ecologists incorporated these diversity  
66 measurements into management decision-making (Primack 1993; Margules & Pressey,  
67 2000, Socolar et al., 2016). For example, the variation of the community assemblages  
68 can quantify biodiversity loss and inform the placement of protected areas and the  
69 management of biological invasions and landscapes (Socolar et al., 2016). Thus, robust  
70 methods for monitoring biodiversity are fundamental for biodiversity and environmental  
71 management.

72 Environmental DNA (eDNA) analysis is considered a useful tool to  
73 investigate the distribution and richness of aquatic and terrestrial organisms (Takahara  
74 et al., 2012, 2013; Rees et al., 2014; Goldberg et al., 2015; Miya et al., 2015; Thomsen  
75 & Willerslev, 2015; Doi et al., 2017; Doi et al., 2019; Fujii et al., 2019). High-  
76 throughput sequencing derived from eDNA, called “eDNA metabarcoding”, is an

77 exceptionally useful and powerful tool for community biodiversity surveys (Taberlet et  
78 al., 2012; Deiner et al., 2016, 2017; Sato et al., 2017; Bylemans et al., 2018; Fujii et al.,  
79 2019). eDNA metabarcoding has recently been applied in fish community surveys, e.g.  
80 Miya et al. (2015) designed and applied universal PCR primers (the MiFish primers) to  
81 survey marine fish communities. To confirm the usefulness of eDNA metabarcoding for  
82 community assessment, many studies compared eDNA metabarcoding to a species list  
83 generated by traditional surveys including visual and capture methods (Deiner et al.,  
84 2016; Bylemans et al., 2018; Nakagawa et al., 2018; Yamamoto et al., 2018; Fujii et al.,  
85 2019). However, evaluating the performance of eDNA metabarcoding estimating alpha  
86 diversity was still limited quantitatively and statistically (but Drummond et al., 2015;  
87 Deiner et al., 2016; Staehr et al. 2016, Maechler et al. 2019), especially when gamma  
88 diversity and the variation of the community assemblages evaluating and comparing to  
89 traditional surveys.

90           Variation of the community assemblages is a fundamental aspect for  
91 communities, and it is important for evaluating community responses to environmental  
92 gradients and the spatial locations of community across different habitats and  
93 ecosystems (Chase et al., 2004; Chase, 2010; McCune & Vellend, 2013; Socolar et al.,  
94 2016). The variation itself and trends along environmental gradients, such as  
95 productivity and disturbance, can be influenced by alpha diversity (Chase, 2010).  
96 Furthermore, variation of the community assemblages can be influenced by alpha and  
97 gamma diversity (Olden & Poff, 2003; Van Calster et al., 2007; Keith et al., 2009).  
98 Therefore, the variation evaluation of community assemblages can vary considerably  
99 depending on differences in alpha and gamma diversity evaluation by different survey  
100 methods, i.e. eDNA metabarcoding vs. traditional surveys.

101           Variation of the community assemblages is considered to reflect two different  
102 components: nestedness and species turnover (Harrison et al., 1992; Baselga et al.,  
103 2007; Baselga, 2010). Nestedness occurs when the community at the sites with less  
104 species are subsets of the community at the sites with higher species richness (Wright &  
105 Reeves, 1992; Ulrich & Gotelli, 2007) and generally reflects a non-random process of  
106 species loss (Gaston & Blackburn, 2000). Contrastingly, species turnover implies the  
107 replacement of some species by others because of environmental sorting or  
108 spatial/historical constraints (Baselga, 2010). Statistical separation methods for  
109 nestedness and species turnover were applied for evaluating variation of the community  
110 assemblages in various systems (Baselga, 2010; Baselga et al., 2012). However, the  
111 method has never been applied to evaluate the performance of eDNA metabarcoding  
112 estimating community assemblages of fish species. Moreover, Baselga's (2010)  
113 framework can be applied to compare the performance among methods when evaluating  
114 alpha diversity via nestedness and species turnover.

115           Using statistical methods, we can quantitatively compare the performance of  
116 eDNA metabarcoding and traditional surveys for alpha/gamma diversity evaluation of  
117 biological communities and the variation of the community assemblages among the  
118 study sites. Here, we tested the performance of eDNA metabarcoding in five river  
119 systems in different regions with various fish species. We conducted eDNA  
120 metabarcoding using universal MiFish primers that target fish and identified the fish by  
121 visual snorkeling and hand-net capture surveys. We evaluated the performance of  
122 eDNA metabarcoding by comparing the obtained fish community structure to that  
123 evaluated by visual/capture survey with special regard to nestedness and species  
124 turnover.

125

## 126 **Methods**

127

### 128 Site description

129 In 2016, we conducted field surveys in five river systems across Japan (river map in  
130 Fig. S1): the Kyuragi River on October 10, the Koishiwara River on October 21, the  
131 Yato River on October 25, the Hazuki River on November 2, and the Oze River on  
132 November 6. The survey sites were set at a site at each of three river segments  
133 (upstream, mid-stream, and downstream, the internal distances ranged from 4.5 to 25.8  
134 km, Fig. S1) for each river. Each site was set so that the length in the up-down direction  
135 was approximately 100 m with a riffle at the downstream end (e.g., Fig. S2).

136

### 137 Water collection for eDNA survey

138 In each site, we collected 1 L of surface water in bleached bottles at two points, the  
139 stream near the downstream end and the shore with static or semi-static water (Fig. S2)  
140 immediately before visual and capture surveys. eDNA was removed from the bottles  
141 and filtering equipment using 10% commercial bleach (ca. 0.6% hypochlorous acid) and  
142 washing with DNA-free distilled water. One milliliter of benzalkonium chloride (BAC,  
143 10% w/v) was added per liter of water sample to avoid a decrease in eDNA  
144 concentration in the samples (Yamanaka et al., 2016). During transport, samples were  
145 stored in a cooler with ice packs. The ‘cooler blank’ contained 1 L DNA-free water,  
146 which we brought to the field and treated identically to the other water samples, except  
147 that it was not opened at the field sites.

148

149 Visual observation and capture methods

150 After water sampling, the fish fauna survey was conducted by visual observation with  
151 snorkel and collection with hand net. For visual observation, we observed and recorded  
152 fish species by snorkeling in a 100-m transect (snorkeling by 1 person for 1 h, Fig. S2).  
153 We observed at various micro habitats, including the riffle, pool, and shore bank from  
154 the downstream end to upstream end. We also conducted a hand-net capture survey (1  
155 person  $\times$  1 h) using a D-frame net (2 mm mesh, net opening: 0.16 m<sup>2</sup>) in the various  
156 habitats in the river, including the riffle, pool, and shore bank. Fishes were identified  
157 according to Nakabo et al. (2013) at the survey site. We used the combined taxa list  
158 from both traditional surveys to compare to that of eDNA metabarcoding. In order to  
159 prevent contamination of eDNA samples, the investigator who collected and identified  
160 the fish and the investigator who sampled the water were different.

161

162 eDNA collection, extraction and measurements

163 Collected water samples were vacuum-filtered into GF/F glass filters (47 mm diameter,  
164 pore size: 0.7  $\mu$ m, GE Healthcare, Little Chalfont, UK) in the laboratory within 24 h of  
165 sampling. After filtration, all filters were stored at -20 °C before eDNA extraction. The  
166 cooler blank was also processed in the same manner. A liter of Milli-Q water was used  
167 as the filtering blank to monitor contamination during filtering in each site and during  
168 subsequent DNA extraction.

169 To extract the DNA from the filters, we followed the methods described in  
170 Uchii, Doi, & Minamoto (2016). We incubated the filter by submerging the mixed  
171 buffer of 400  $\mu$ L of Buffer AL in DNeasy Blood & Tissue Kit (Qiagen, Hilden,  
172 Germany) and 40  $\mu$ L of Proteinase K (Qiagen, Hilden, Germany), using a Salivette tube



173 (Sarstedt, Nümbrecht, Germany) at 56 °C for 30 min. The Salivette tube with filters was  
174 centrifuged at 5000 × g for 5 min. Then, we added 220 µL of TE buffer (pH: 8.0) onto  
175 the filter and again centrifuged at 5000 × g for 5 min. The DNA was purified using a  
176 DNeasy Blood & Tissue Kit with extracted the DNA in 200 µL in Buffer AE. Samples  
177 were stored at -20 °C until the 1st-PCR assay.

178

### 179 *Library preparation and MiSeq sequencing*

180 The detailed molecular methods are described in Fujii et al. (2019) with a two-step  
181 PCR-procedure for Illumina MiSeq sequencing. Briefly, we performed 1st-PCR  
182 with MiFish-U-F and MiFish-U-R primers (Miya et al., 2015), which were designed to  
183 contain Illumina sequencing primer regions and 6-mer Ns;

184 Forward: 5'-*ACACTCTTTCCCTACACGACGCTCTTCCGATCT* NNNNNN

185 GTCGGTAAACTCGTGCCAGC-3',

186 Reverse: 5'-*GTGACTGGAGTTCAGACGTGTGCTCTTCCGATCT* NNNNNN

187 CATAGTGGGGTATCTAATCCCAGTTTG-3'

188 The italicized and non-italicized letters represent MiSeq sequencing primers  
189 and MiFish primers, respectively, and the six random bases (N) were used to enhance  
190 cluster separation on the flow cells during initial base call calibrations on the MiSeq  
191 (Miya et al. 2015, Doi et al. 2019).

192 We performed the 1st-PCR with a 12 µL reaction volume containing 1× PCR  
193 Buffer for KOD FX Neo (Toyobo, Osaka, Japan), 0.4 mM dNTP mix, 0.24 U KOD FX  
194 Neo polymerase, 0.3 µM of each primer, and 2 µL template. The thermocycling  
195 conditions for this step were as follows: initial denaturation at 94 °C for 2 min, followed  
196 by 35 cycles of denaturation at 98 °C for 10 s, annealing at 65 °C for 30 s, and

197 elongation at 68 °C for 30 s, followed by final elongation at 68 °C for 5 min. The first  
198 PCRs were performed using eight replicates (Doi et al. 2019) and individual first PCR  
199 replicates were pooled and purified using AMPure XP (Beckman Coulter, Brea CA,  
200 USA) as templates for the 2nd-PCR. The Illumina sequencing adaptors and the eight bp  
201 identifier indices (XXXXXXXX) were added to the subsequent PCR process using a  
202 forward and reverse fusion primer:

203 Forward: 5'-*AATGATACGGCGACCACCGAGATCTACA* XXXXXXXX

204 *ACACTCTTCCCTACACGACGCTCTTCCGATCT*-3'

205 Reverse: 5'-*CAAGCAGAAGACGGCATACGAGAT* XXXXXXXX

206 *GTGACTGGAGTTCAGACGTGTGCTCTTCCGATCT*-3'

207           The italicized and non-italicized letters represent MiSeq P5/P7 adapter and  
208 sequencing primers, respectively. The 8X bases represent dual-index sequences inserted  
209 to identify different samples (Hamady 2008). We performed the 2nd-PCR with 12  
210 cycles of a 12 µL reaction volume containing 1× KAPA HiFi HotStart ReadyMix, 0.3  
211 µM of each primer, and 1.0 µL of the first PCR production. The thermocycling  
212 conditions profile after an initial 3 min denaturation at 95 °C was as follows:  
213 denaturation at 98 °C for 20 s, annealing, and extension combined at 72 °C (shuttle  
214 PCR) for 15 s, with the final extension at the same temperature for 5 min. We  
215 confirmed the positive bands of the targeted 1st-PCR amplicons by electrophoresis. The  
216 2nd-PCR products were pooled in equal volumes and purified using AMPure XP.

217           The purified PCR products were loaded on a 2% E-Gel SizeSelect (Thermo  
218 Fisher Scientific, Waltham, MA, USA) and the target size of the libraries  
219 (approximately 370 bp) was collected. The samples concentration and quality were  
220 estimated by a Qubit dsDNA HS assay kit and a Qubit 2.0 (Thermo Fisher Scientific).

221 The amplicon libraries were sequenced by  $2 \times 250$  bp paired-end sequencing on the  
222 MiSeq platform using the MiSeq v2 Reagent Kit. Note that the sequencing run  
223 contained a total of 339 libraries including 40 of our library (30 samples plus five cooler  
224 and five filter negative controls) and 299 libraries from other research projects. The  
225 MiSeq sequencing was conducted in the Department of Environmental Solution  
226 Technology, Faculty of Science and Technology, Ryukoku University. All sequence  
227 data were deposited in DNA Data Bank of Japan (DRA, Accession number:  
228 DRA008090).

229

230 Bioinformatic analysis for MiSeq sequencing

231 The detailed procedures used for bioinformatics analysis are described in Fujii et al.  
232 (2019). First, low-quality tails were trimmed from each read and paired-end reads were  
233 then merged. For the obtained 1,823,446 reads, primer sequences were removed and  
234 identical sequences (i.e., 100% sequence similarity) were merged using UCLUST  
235 (usearch 7.0.1001, Edgar, 2010). The sequences with 10 or more identical reads were  
236 subjected to the downstream processes. To annotate the taxonomy, local BLASTN  
237 search using BLAST 2.2.29 was conducted with the reference database of fish species  
238 for processed reads (Miya et al., 2015). The top BLAST hit with a sequence identity  $\geq$   
239 97% was applied to species detection of each sequence. Note that the species were  
240 mostly identified with a  $\geq 99\%$  match. From the BLAST results, we identified the  
241 species using methods previously described (Sato et al., 2017). Also, we detected the  
242 most of fish species inhabiting the rives in the regions with regarding to the known  
243 distributions (Kawanabe et al. 2001).

244

245 Statistical analyses

246 All statistical analyses and graphics were conducted in R ver. 3.4.4 (R Core Team,  
247 2018). All statistics were set at the significance level  $\alpha = 0.05$ . To compare between  
248 eDNA metabarcoding and visual survey data, the taxonomic levels in the species list  
249 from visual survey were compared to the lists from eDNA metabarcoding (Table S1,  
250 S2) in reference to previous studies using the MiFish primer (Sato et al., 2017; Fujii et  
251 al., 2019). Before statistical analysis, we confirmed that the sequencing depth was  
252 sufficient to detect alpha diversity in the samples by “iNEXT” and “ggiNEXT”  
253 functions in the “iNEXT” ver. 2.0.19 package (Chao et al. 2014, Fig. S3). We merged  
254 the community data from two points, the stream near the downstream end and the shore,  
255 to compare with visual/capture surveys.

256 We tested the differences in fish richness of sites, segments, and rivers  
257 between both methods using generalized linear mixed models (GLMMs) with the  
258 “lmer” function in the “lme4” ver. 1.1-21 package (Bates et al. 2015). In the GLMM  
259 models, the method was treated as a fixed effect with Poisson distribution, and the  
260 rivers and segments were treated as random effects.

261 The differences in community compositions were visualized using nonmetric  
262 multidimensional scaling (NMDS) with 500 separate runs of real data. For NMDS, the  
263 community dissimilarity was calculated based on incidence-based Jaccard indices. We  
264 evaluated the differences in community structures between methods and sites using  
265 permutational multivariate analysis of variance (PERMANOVA). For PERMANOVA,  
266 we used Jaccard and Raup-Crick similarity matrix and calculated the statistical values  
267 with 999 permutations. Raup-Crick index is the probability that compared the sampling  
268 sites have non-identical species composition (i.e., considering the alpha diversity of

269 sites). We used “metaMDS” and “adonis” functions in the “vegan” ver. 2.5-6 package  
270 (<https://github.com/vegandevs/vegan>) for NMDS ordination and PERMANOVA,  
271 respectively.

272 For the communities evaluated by both methods, indicator taxa analysis  
273 (Cáceres & Legendre, 2009) was performed to determine which taxa had significantly  
274 different frequencies between both methods. The analysis was performed using the  
275 “signassoc” function in the “indicspecies” ver. 1.7.8 package on the present/absence  
276 data for the testing with regarding the package description and Cáceres & Legendre  
277 (2009). The “signassoc” function can calculate the index with both present/absence and  
278 abundance data. We used mode = 1 (group-based) and calculated the *P*-values with 999  
279 permutations after Sidak’s correction of the multiple testing.

280 To compare community composition (i.e., the variation of the community  
281 assemblages) focusing on nested and turnover structures between eDNA metabarcoding  
282 and visual/capture survey, we calculated the pairwise indices for nestedness and species  
283 turnover (Baselga, 2010; Baselga, 2012) using the “beta.pair” function in the “betapart”  
284 ver. 1.5.1 package (Baselga and Orme 2012). Standardized effect sizes (SEs) of  
285 nestedness and turnover indices were calculated to show the degree of nestedness and  
286 turnover structure. The significance was defined by deviation from zero, and the  
287 expectation of random assembly (a null model) was estimated with 999 random  
288 sampling replicates. The SES was defined as follows:  $(\beta_{\text{obs}} - \beta_{\text{null}})/\beta_{\text{sd}}$ , where  $\beta_{\text{obs}}$  is the  
289 observed beta diversity (here, the variation of the community assemblages among the  
290 sites),  $\beta_{\text{null}}$  is the mean of the null distribution of beta diversity, and  $\beta_{\text{sd}}$  is the standard  
291 deviation of the null distribution. SES values greater than zero indicate statistically  
292 stronger nestedness or turnover structure than expected under a random model of

293 community assembly, while negative values indicate weaker nestedness or turnover  
294 than expected. The randomized community data were generated with independent swap  
295 algorithm (Gotelli, 2000) using “randomizeMatrix” function in the “picante” ver. 1.8  
296 package (Kembel et al. 2010). First, to evaluate the differences in nestedness and  
297 species turnover between the survey methods (eDNA metabarcoding vs. visual/capture  
298 survey) at the same segments, the SES of pairwise nestedness and turnover were  
299 calculated for each sample pair within the river. Then, the fish community longitudinal  
300 nestedness and turnover structure along with river flow (i.e., upstream to downstream)  
301 by each method was evaluated with NODF and pairwise indices of nestedness. First, a  
302 nestedness metric (NODF, Almeida-Neto et al., 2008) and their SES value were  
303 calculated with 999 randomizations using the “nestednodf” and the “oecosimu” function  
304 in the “vegan” package. Then, we tested the differences in SES of pairwise indices  
305 between the survey methods (eDNA metabarcoding vs. visual/capture survey) by  
306 generalized linear mixed model (GLMM, with Gaussian distribution) with the “lmer”  
307 function in the “lme4” package. In the GLMM models, the SES of pairwise indices was  
308 treated as a fixed effect, and the rivers-pairs and segment-pairs (i.e., three pairs in each  
309 river) were treated as random effects.

310 For the map graphics in Supplemental Materials, we used the stream and coast line data  
311 from the National Land Information Division, Ministry of Land, Infrastructure,  
312 Transport and Tourism of Japan (<http://nlftp.mlit.go.jp/ksj/>).

313

## 314 **Results**

315

316 Overview

317 We detected 53 fish taxa, almost all identified to the species or genus level, by eDNA  
318 metabarcoding in five rivers (Table S1, and S2) and visually observed 38 fish taxa in  
319 total. MiSeq paired-end sequencing for the library (30 samples plus five cooler and five  
320 filter negative controls) yielded a total of 1,601,816 reads ( $53,351 \pm 17,639$ ; mean  $\pm$  S.  
321 D. for each sample, Table S2). We confirmed very low reads from negative controls  
322 (Table S2) with only detecting a fish species, *Tridentiger* sp. in the blank of the Yato  
323 River, probably because of the cross-contamination among the samples. The read of  
324 *Tridentiger* sp. in these samples (4783-9818 reads) were high than the detected sites  
325 (1286 reads), therefore we used the species for the analysis.

326

327 Diversity indices between methods

328 We found significant differences in fish local richness (alpha diversity) between eDNA  
329 metabarcoding and visual/capture surveys (Fig. 1, GLMM with river as a random effect,  
330  $t = -5.45$ ,  $P = 0.000018$ ). Richness was significantly different among river segments ( $t$   
331  $= -5.85$ ,  $P = 0.000004$ ), indicating higher alpha diversity estimated by eDNA  
332 metabarcoding than by visual/capture surveys. While, richness was not significantly  
333 different among rivers ( $t = 1.737$ ,  $P = 0.0942$ ).

334 We found differences in community structure between the two methods by  
335 NMDS ordination by Jaccard index (Fig. 2) as well as Raup-Crick (Fig. S4), especially  
336 among the study rivers. The patterns of differences in the both Jaccard and Raup-Crick  
337 indices were similar.

338 The PERMANOVA results with Jaccard and Raup-Crick indices for the  
339 ordination suggested there were differences in community composition evaluated by  
340 each method, eDNA metabarcoding and visual/capture survey ( $P < 0.012$ , Table S3).

341 Moreover, communities from the combined results of eDNA metabarcoding and  
342 visual/capture survey were significantly different among rivers and segments ( $P <$   
343 0.029, Table S3). We found different patterns in ordinated river sites for each method  
344 (Fig. 2 for Jaccard index, Fig. S4 for Raup-Crick index).

345 To test the community differences among the segments and rivers, the  
346 PERMANOVA results with Jaccard index determined that communities were  
347 significantly different among the rivers by eDNA metabarcoding ( $P = 0.001$ ) but not by  
348 visual/capture survey ( $P = 0.12$ , Table S4). Conversely, the communities were  
349 significantly different among river segments by visual/capture survey ( $P = 0.011$ ) but  
350 not significantly different (albeit marginally) by eDNA metabarcoding ( $P = 0.061$ ,  
351 Table S4). The differences in PERMANOVA results with Jaccard index suggested that  
352 differences in the variation of the community assemblages among rivers across regions  
353 can be detected by eDNA metabarcoding but not by visual/capture survey. While, the  
354 PERMANOVA results with Raup-Crick index determined that communities were  
355 significantly different among the rivers by the both eDNA metabarcoding ( $P = 0.001$ )  
356 and visual/capture survey ( $P = 0.018$ , Table S4).

357 Indicator taxa analysis comparing the communities estimated by both  
358 methods, eDNA metabarcoding and visual/capture survey, detected capture bias by both  
359 methods for several several taxa, including Japanese eel (*Anguilla japonica*), salmon  
360 (e.g., *Oncorhynchus masou*), and Amur catfish (*Silurus asotus*) ( $P < 0.05$ , Table 1 for  
361 statistically significant taxa, Table S5 for all taxa).

362

363 Nestedness and species turnover



364 We compared the pairwise standardized effect size (pSES) between eDNA  
365 metabarcoding and visual/capture survey in nestedness and species turnover (Fig. 3).  
366 Nestedness pSES was significantly positive without overlapping the zero-pSES 95%  
367 confidence interval, indicating that the visual/capture survey community was nested in  
368 that detected by eDNA metabarcoding. The significantly negative pSES in species  
369 turnover indicated that the taxa did not significantly turnover in the community  
370 evaluated by eDNA metabarcoding and visual/capture survey compared to that in  
371 random communities in the segment-scale comparisons.

372 We compared the longitudinal nested structure (upstream to downstream) of the fish  
373 community in the study rivers using nested pSES (Fig. 4a). The longitudinal nested  
374 structure was not significantly different between both methods (GLMM,  $P = 0.302$ ).  
375 The positive pSES indicated that downstream communities were significantly nested in  
376 the upstream ones. The species per segment were nested as downstream > mid-stream >  
377 upstream both methods (Fig. S5 and S6, NOFD,  $P < 0.001$ ). We also compared the  
378 longitudinal species turnover of fish communities in the study rivers using turnover  
379 pSES (Fig. 4b). The longitudinal species turnover was not significantly different  
380 between both methods (GLMM,  $P = 0.280$ ) and the negative turnover values indicated  
381 no turnover observed.

382

### 383 **Discussion**

384

385 We found that river fish communities estimated by eDNA metabarcoding were  
386 significantly nested in the communities estimated by visual/capture survey.  
387 Furthermore, the species turnover in the communities was very weak between methods.

388 Nestedness of species assemblages occurs when the communities obtained by the  
389 method estimating lower number of species are subsets of the communities estimated by  
390 other methods with higher species richness (Baselga 2010). The eDNA metabarcoding  
391 estimated higher alpha diversity than visual/capture survey for river fish communities  
392 and provide the similar gamma diversity and species composition with visual/capture  
393 survey. In fact, the fish local and regional richness (alpha and gamma diversity)  
394 evaluated by eDNA metabarcoding was significantly higher, including almost all taxa  
395 evaluated by visual/capture survey.

396 eDNA metabarcoding has been reported to perform better than traditional  
397 methods in evaluating species richness (Deiner et al., 2016; Sato et al., 2017; Bylemans  
398 et al., 2018; Nakagawa et al., 2018; Yamamoto et al., 2018; Fujii et al., 2019).  
399 Nakagawa et al. (2018) investigated freshwater fish communities in 100 rivers and  
400 confirmed that the community detected by eDNA metabarcoding were similar to the  
401 species lists observed in government-authorized monitoring. Furthermore, several  
402 eDNA metabarcoding studies on fish communities have been performed in other river  
403 systems (Bylemans et al., 2018), marine habitats (Yamamoto et al., 2018), and  
404 freshwater lakes (Sato et al., 2017; Fujii et al., 2019). Deiner et al. (2016) showed that  
405 river eDNA metabarcoding can reflect the community in a watershed, indicating that  
406 eDNA metabarcoding has high performance for gamma diversity evaluation. These  
407 studies indicated the great potential of eDNA metabarcoding as a useful tool for alpha  
408 and gamma diversity assessment by simply comparing the community data obtained  
409 from eDNA metabarcoding and traditional surveys. However, previous studies did not  
410 evaluate performance in terms of nestedness and species turnover between eDNA  
411 metabarcoding and other community data. Here, we support the previous literature

412 (Maechler et al. 2019) by showing patterns observed in alpha and gamma diversity are  
413 also observed in nestedness, species turnover, and the capture bias of communities  
414 detected by eDNA metabarcoding and traditional methods in segment scale. With  
415 comparing to the same segment of the same river we found that the community detected  
416 by visual/capture survey was nested with that by eDNA metabarcoding, with scarce  
417 species turnover in the community.

418 We especially focused on the variation of the community assemblages  
419 evaluated by eDNA metabarcoding compared to visual/capture survey. For evaluating  
420 the fish communities, the community compositions were different between eDNA  
421 metabarcoding and visual/capture survey. That is, eDNA metabarcoding detected  
422 significant differences between the rivers, while visual/capture survey detected  
423 significant differences between the segments rather than between the rivers. On the  
424 other hand, with focusing on a single river, the patterns of nestedness and species  
425 turnover were not significantly different between eDNA metabarcoding and  
426 visual/capture survey.

427 Using Jaccard index, a higher variation of the river fish communities was  
428 statistically detected by eDNA metabarcoding than by visual/capturing survey and the  
429 variation of the community assemblages between segments could be significantly  
430 detected by visual/capture surveys but not by eDNA metabarcoding. While the results  
431 of Raup-Crick index, considering the alpha diversity of sites, showed the same results of  
432 the both methods. This might suggest that Jaccard dissimilarity detect significant  
433 differences between the segments for visual/capturing survey due to the low number of  
434 species detected in the upstream. These differences in the variation of the community  
435 assemblage evaluation may lead us to interpret the variation of the community

436 assemblages using the results from both survey methods, eDNA and visual/capture  
437 survey.

438           We further compared the indicator taxa for the communities obtained from  
439 both eDNA metabarcoding and visual/capture survey and concluded that several taxa,  
440 including eel, salmon, and catfish, were significantly better detected by eDNA  
441 metabarcoding, whereas non-indicator taxa were detected by visual/capture surveys.  
442 These results indicated that eDNA metabarcoding had higher detection frequency of  
443 visual/capture surveys in fish taxa detection. The community structures estimated by  
444 eDNA metabarcoding and visual/capture survey were slightly different, as reported in  
445 previous studies (e.g., Sato et al., 2017; Fujii et al., 2019), probably because of the  
446 differences in taxa-detection performances. Discriminated taxa in this analysis included  
447 eel, salmon, and catfish, which mostly had larger body size and lower abundances in  
448 these rivers (Kawanabe, 2001; Nakabo, 2013). In fact, the Japanese eel *Anguilla*  
449 *japonica*, was difficult to find by visual observation, probably due to its hiding behavior  
450 (Itakura et al., 2019). Such endangered species would be important as top predators  
451 (Nakabo, 2013). eDNA metabarcoding can evaluate the distribution of such rare and  
452 important taxa in fish communities better than traditional surveys. While we did not  
453 were detect any indicator taxa by visual/capture surveys, we found couple species  
454 detected only by visual/capture surveys, for example, *Lepomis macrochirus* and *Biwia*  
455 *zezera* (see Table S1). *Lepomis macrochirus* usually inhabit in lotic systems and rarely  
456 observed in rivers (Nakabo, 2013). *Biwia zezera* distributed in this region (Hosokawa et  
457 al., 2007). We only observed the both species in a downstream segment of Kyuragi and  
458 Oze river, respectively, thus, this species was rarely observed in this study. Also, the  
459 BLAST identification for *L. macrochirus* and *B. zezera* were preliminary confirmed

460 (Biodiversity Center of Japan, Ministry of Environment, Japan, in Japanese;  
461 [http://www.biodic.go.jp/edna/edna\\_top.html](http://www.biodic.go.jp/edna/edna_top.html)). Therefore, we speculated that we could  
462 not capture the eDNA of *L. macrochirus* and *B. zezera*, due to the sampling timing or  
463 points. Further study needs to the species detection which we captured, especially  
464 rarely-observed species.

465 To evaluate the comparison among the local sites and rivers, we examined the  
466 performances of eDNA metabarcoding at three sites of five rivers with eDNA sampling  
467 from only two habitats. Thus, our understanding of some aspects of the fish community  
468 spatial structure in the rivers and the performance of community evaluation in local  
469 habitats, such as backwater, was still limited. In fact, Bylemans et al. (2018) found that  
470 river morphology in these habitats influenced the optimal sampling strategy for eDNA  
471 metabarcoding. Moreover, in backwater lakes, the performance of eDNA  
472 metabarcoding varied with different lake morphologies (Fujii et al. 2019). However,  
473 testing the usefulness of the eDNA metabarcoding for assessing river fish community  
474 biodiversity has been limited. Further research is needed to evaluate fish community  
475 spatial structure in rivers. In addition, we should consider that eDNA recovered from a  
476 water sample came from an individual in the survey area. The previous studies  
477 suggested the eDNA came from the upstream (Deiner, K., & Altermatt 2014; Deiner et  
478 al. 2016). Therefore, the comparisons between eDNA metabarcoding and visual/capture  
479 methods were using the community data with different spatial scales, for example,  
480 community data from a 100-m reach by visual/capture methods, but eDNA potentially  
481 detected the community in larger area than surveyed. We should carefully consider the  
482 phenomenon, especially for alpha diversity of community.

483           In conclusion, eDNA metabarcoding have similar species detection  
484 performance with the visual/capture survey in evaluating the community among the  
485 rivers. The eDNA metabarcoding was much less effort in the field and detected the  
486 community in broader area than visual/capture survey, therefore, eDNA metabarcoding  
487 may be suitable method, especially for regional community patterns. Biodiversity  
488 testing using statistical frameworks, especially community nestedness and turnover,  
489 provided the quantitative evidence to compare the performance of eDNA  
490 metabarcoding and traditional surveys. eDNA methods for biodiversity assessment may  
491 provide more information to us, as shown here, but we should also pay attention to the  
492 unknown characteristics of eDNA, such as the origins, degradation, and transport of  
493 eDNA in water which are still unknown in various habitats (Barnes & Turner, 2016;  
494 Seymour et al., 2018). To routinely use eDNA methods to assess biodiversity, we  
495 encourage testing the effect of eDNA degradation and transport on the performance of  
496 eDNA methods for biodiversity evaluation.

497

#### 498 **Acknowledgments**

499 MiSeq sequencing was conducted in the Department of Environmental Solution  
500 Technology, Faculty of Science and Technology, Ryukoku University, and we thank to  
501 H. Yamanaka and H. Sato for supporting the experiments involving MiSeq sequencing.  
502 This study was supported by the Environment Research and Technology Development  
503 Fund (4-1602) of Environmental Restoration and Conservation Agency, Japan and JST-  
504 CREST (JPMJCR13A2).

505

#### 506 **Data availability**

507 All data of the MiSeq sequencing was shared in DRA (Accession number:  
508 DRA008090), and the observed species data was shared in Table S2 in Supplemental  
509 Materials.

510

### 511 **Author contributions**

512 HD, RI, and YA designed the study, RI, MG, TK, and YA contributed to field survey  
513 and sampling. SM, HD, RI, and MG contributed to molecular experiments. SM and HD  
514 analyzed the data and interpreted the results. HD, SM, and RI wrote the initial draft of  
515 the manuscript. All other authors critically reviewed the manuscript.

516

### 517 **References**

- 518 Almeida-Neto, M., Guimaraes, P., Guimaraes, P. R., Loyola, R. D., & Ulrich, W.  
519 (2008). A consistent metric for nestedness analysis in ecological systems:  
520 reconciling concept and measurement. *Oikos*, 117, 1227–1239.
- 521 Barnes, M. A., & Turner, C. R. (2016). The ecology of environmental DNA and  
522 implications for conservation genetics. *Conservation Genetics*, 17(1), 1–17.
- 523 Baselga, A., Jimenez-Valverde, A., & Niccolini, G. (2007). A multiple-site similarity  
524 measure independent of richness. *Biology Letters*, 3, 642–645.
- 525 Baselga, A. (2010). Multiplicative partition of true diversity yields independent alpha  
526 and beta components; additive partition does not. *Ecology*, 91(7), 1974–1981.
- 527 Baselga, A. (2012). The relationship between species replacement, dissimilarity derived  
528 from nestedness, and nestedness. *Global Ecology and Biogeography*, 21, 1223–  
529 1232.

- 530 Baselga, A., Gómez-Rodríguez, C., & Lobo, J. M. (2012). Historical legacies in world  
531 amphibian diversity revealed by the turnover and nestedness components of beta  
532 diversity. *PloS ONE*, 7(2), e32341.
- 533 Baselga, A., & Orme, C. D. L. (2012). betapart: an R package for the study of beta  
534 diversity. *Methods in Ecology and Evolution*, 3, 808-812.
- 535 Bates, D., Maechler, M., Bolker, B., & Walker, S. (2015). Fitting Linear Mixed-Effects  
536 Models Using lme4. *Journal of Statistical Software*, 67, 1-48.
- 537 Bista, I., Carvalho, G. R., Walsh, K., Seymour, M., Hajibabaei, M., Lallias, D., et al.  
538 (2017). Annual time-series analysis of aqueous eDNA reveals ecologically  
539 relevant dynamics of lake ecosystem biodiversity. *Nature communications*, 8,  
540 14087.
- 541 Bylemans, J., Gleeson, D. M., Lintermans, M., Hardy, C. M., Beitzel, M., ... Furlan, E.  
542 M. (2018). Monitoring riverine fish communities through eDNA metabarcoding:  
543 determining optimal sampling strategies along an altitudinal and biodiversity  
544 gradient. *Metabarcoding and Metagenomics*, 2, e30457.
- 545 Cáceres, M. D., & Legendre, P. (2009). Associations between species and groups of  
546 sites: indices and statistical inference. *Ecology*, 90(12), 3566–3574.
- 547 Chao, A., Gotelli, N. J., Hsieh, T. C., Sander, E. L., Ma, K. H., Colwell, R. K., &  
548 Ellison, A. M. (2014). Rarefaction and extrapolation with Hill numbers: a  
549 framework for sampling and estimation in species diversity studies. *Ecological*  
550 *Monographs*, 84, 45-67.
- 551 Chase, J. M., & Ryberg, W. A. (2004). Connectivity, scale-dependence, and the  
552 productivity–diversity relationship. *Ecology Letters*, 7(8), 676–683.



- 553 Chase, J. M. (2010). Stochastic community assembly causes higher biodiversity in more  
554 productive environments. *Science*, 328, 1388–1391.
- 555 Cox, M. P., Peterson, D. A., & Biggs, P. J. (2010). SolexaQA: at-a-glance quality  
556 assessment of Illumina second-generation sequencing data. *BMC Bioinform.*, 11,  
557 485.
- 558 Deiner, K., & Altermatt, F. (2014). Transport distance of invertebrate environmental  
559 DNA in a natural river. *PLOS ONE*, 9, e88786.
- 560 Deiner, K., Fronhofer, E. A., Mächler, E., Walser, J. C., & Altermatt, F. (2016).  
561 Environmental DNA reveals that rivers are conveyer belts of biodiversity  
562 information. *Nature Communications*, 7, 12544.
- 563 Deiner K, Bik, H. M., Mächler, E., Seymour, M., Lacoursière-Roussel, A., Altermatt,  
564 F., ... Pfrender, M. E. (2017). Environmental DNA metabarcoding:  
565 Transforming how we survey animal and plant communities. *Molecular*  
566 *Ecology*, 26, 5872–5895. doi: 10.1111/mec.14350.
- 567 Doi, H., Fukaya, K., Oka, S. I., Sato, K., Kondoh, M., & Miya, M. (2019). Evaluation  
568 of detection probabilities at the water-filtering and initial PCR steps in  
569 environmental DNA metabarcoding using a multispecies site occupancy model.  
570 *Scientific Reports*, 9, 3581.
- 571 Doi, H., Inui, R., Akamatsu, Y., Kanno, K., Yamanaka, H., Takahara, T., & Minamoto,  
572 T. (2017). Environmental DNA analysis for estimating the abundance and  
573 biomass of stream fish. *Freshwater Biology*, 6, 30–39.
- 574 Doi, H., & Takahara, T. (2016). Global patterns of conservation research importance in  
575 different countries of the world. *PeerJ*, 4, e2173.

- 576 Edgar, R. C. (2010). Search and clustering orders of magnitude faster than BLAST.  
577 *Bioinformatics*, 26, 2460–2461. doi: 10.1093/bioinformatics/btq461.
- 578 Fujii, K., Doi, H., Matsuoka, S., Nagano, S., Sato, H., & Yamanaka, H. (2019).  
579 Environmental DNA metabarcoding for fish community analysis in backwater  
580 lakes: A comparison of capture methods. *PLoS ONE*, 14, e0210357.
- 581 Gaston, K. J., & T. M. Blackburn. (2000). Pattern and process in macroecology.  
582 Blackwell Scientific, Oxford.
- 583 Goldberg, C. S., Strickler, K. M., & Pilliod, D. S. (2015). Moving environmental DNA  
584 methods from concept to practice for monitoring aquatic macroorganisms.  
585 *Biological Conservation*, 183, 1–3. doi: 10.1016/j.biocon.2014.11.040.
- 586 Gotelli, N. J. (2000). Null model analysis of species co-occurrence patterns. *Ecology*,  
587 81, 2606–2621.
- 588 Hamady, M., Walker, J. J., Harris, J. K., Gold, N. J., & Knight, R. (2008). Error-  
589 correcting barcoded primers for pyrosequencing hundreds of samples in multiplex.  
590 *Nature Methods*, 5, 235–237.
- 591 Harrison, S., Ross, S. J., & Lawton, J. H. (1992). Beta-diversity on geographic gradients  
592 in Britain. *Journal of Animal Ecology*, 61, 151–158.
- 593 Horikawa, M., Nakajima, J. and Mukai, T. (2007). Distribution of indigenous and non-  
594 indigenous mtDNA haplotypes of *Biwia zezera* (Cyprinidae) in northern  
595 Kyushu. *Japanese Journal of Ichthyology*, 54, 149-159.
- 596 Itakura, H., Wakiya, R., Yamamoto, S., Kaifu, K., Sato, T., & Minamoto, T. (2019).  
597 Environmental DNA analysis reveals the spatial distribution, abundance, and  
598 biomass of Japanese eels at the river-basin scale. *Aquatic Conservation: Marine  
599 and Freshwater Ecosystems*, 29(3), 361–373.

- 600 Kawanabe, H., Mizuno, N. & K. Hosoya (eds.) (2001) Freshwater Fishes of Japan  
601 Yama-Kei, Tokyo (in Japanese).
- 602 Keith, S. A., Newton, A. C., Morecroft, M. D., Bealey, C. E., & Bullock, J. M. (2009)  
603 Taxonomic homogenization of woodland plant communities over 70 years.  
604 Proceedings of the Royal Society of London. Series B, Biological science, 276,  
605 3539–3544.
- 606 Kembel, S. W., Cowan, P. D., Helmus, M. R., Cornwell, W. K., Morlon, H., Ackerly,  
607 D. D., et al. (2010). Picante: R tools for integrating phylogenies and ecology.  
608 Bioinformatics, 26, 1463-1464.
- 609 Margules, C. R., & Pressey, R. L. (2000). Systematic conservation planning. Nature,  
610 405, 243.
- 611 Maechler, E., Little, C.J., Wuethrich, R., Alther, R., Fronhofer, E.A., Gounand, I.,  
612 Harvey, E., Huerlemann, S., Walser, J.-C. & Altermatt, F. (2019). Assessing  
613 different components of diversity across a river network using eDNA.  
614 Environmental DNA, 1, 290-301.
- 615 McCune, J. L., & Vellend, M. (2013). Gains in native species promote biotic  
616 homogenization over four decades in a human-dominated landscape. Journal of  
617 Ecology, 101, 1542–1551.
- 618 Miya, M., Sato, Y., Fukunaga, T., Sado, T., Poulsen, J. Y., Sato, K., ... Kondoh, M.  
619 (2015). MiFish, a set of universal PCR primers for metabarcoding environmental  
620 DNA from fishes: detection of more than 230 subtropical marine species. Royal  
621 Society Open Science, 2, 150088.
- 622 Nakabo, T. (2013). Fishes of Japan with pictorial keys to the species, 3rd ed. Tokai  
623 University Press (in Japanese).

- 624 Nakagawa, H., Yamamoto, S., Sato, Y., Sado, T., Minamoto, T., & Miya, M. (2018).  
625 Comparing local- and regional-scale estimations of the diversity of stream fish  
626 using eDNA metabarcoding and conventional observation methods. *Freshwater*  
627 *Biology*, 63, 569–580.
- 628 Olden, J. D., & Poff, N. L. (2003). Toward a mechanistic understanding and prediction  
629 of biotic homogenization. *The American Naturalist*, 162, 442–460.
- 630 Pecl, G. T., Araújo, M. B., Bell, J. D., Blanchard, J., Bonebrake, T. C., Chen, I. C., ...  
631 Falconi, L. (2017). Biodiversity redistribution under climate change: Impacts on  
632 ecosystems and human well-being. *Science*, 355, 9214.
- 633 Primack, R. B. (1993). *Essentials of conservation biology* (Vol. 23). Sunderland,  
634 Massachusetts: Sinauer Associates.
- 635 R Development Core Team. (2018). *R: A language and environment for statistical*  
636 *computing*. R Foundation for Statistical Computing, Vienna, Austria.  
637 <https://www.R-project.org/>.
- 638 Rees, H. C., Maddison, B. C., Middleditch, D. J., Patmore, J. R., & Gough, K. C.  
639 (2014). Review: the detection of aquatic animal species using environmental DNA  
640 — a review of eDNA as a survey tool in ecology. *Journal of Applied Ecology*, 51,  
641 1450–1459. doi: 10.1111/1365-2664.12306.
- 642 Sato, H., Sogo, Y., Doi, H., & Yamanaka, H. (2017). Usefulness and limitations of  
643 sample pooling for environmental DNA metabarcoding of freshwater fish  
644 communities. *Scientific Reports*, 7, 14860. doi: 10.1038/s41598-017-14978-6.
- 645 Schmieder, R., Lim, Y. W., Rohwer, F., & Edwards, R. (2010). TagCleaner:  
646 Identification and removal of tag sequences from genomic and metagenomic  
647 datasets. *BMC Bioinformatics*, 11, 341, doi: 10.1186/1471-2105-11-341.

- 648 Seymour, M., Durance, I., Cosby, B. J., Ransom-Jones, E., Deiner, K., Ormerod, S.  
649 J., ... Edwards, F. (2018). Acidity promotes degradation of multi-species  
650 environmental DNA in lotic mesocosms. *Communications Biology*, 1(1), 4.
- 651 Socolar, J. B., Gilroy, J. J., Kunin, W. E., & Edwards, D. P. (2016). How should beta-  
652 diversity inform biodiversity conservation? *Trends in Ecology & Evolution*, 31(1),  
653 67–80.
- 654 Taberlet, P., Coissac, E., Pompanon, F., Brochmann, C., & Willerslev, E. (2012).  
655 Towards next-generation biodiversity assessment using DNA metabarcoding.  
656 *Molecular Ecology*, 21(8), 2045–2050.
- 657 Takahara, T., Minamoto, T., & Doi, H. (2013). Using environmental DNA to estimate  
658 the distribution of an invasive fish species in ponds. *PLoS ONE*, 8, e56584 doi:  
659 10.1371/journal.pone.0056584.
- 660 Takahara, T., Minamoto, T., & Doi, H. (2013). Using environmental DNA to estimate  
661 the distribution of an invasive fish species in ponds. *PLoS ONE*, 8, e56584.
- 662 Thomsen, P. F., Willerslev, E. (2015). Environmental DNA—an emerging tool in  
663 conservation for monitoring past and present biodiversity. *Biological*  
664 *Conservation*, 183, 4–18. doi: 10.1016/j.biocon.2014.11.019.
- 665 Uchii, K., Doi, H., & Minamoto, T. (2016). A novel environmental DNA approach to  
666 quantify the cryptic invasion of non-native genotypes. *Molecular Ecology*  
667 *Resources*, 16, 415–422. doi: 10.1111/1755-0998.12460.
- 668 Ulrich, W., & Gotelli, N. J. (2007). Null model analysis of species nestedness patterns.  
669 *Ecology*, 88(7), 1824–1831.
- 670 Van Calster, H., Baeten, L., De Schrijver, A., De Keersmaecker, L., Rogister, J. E.,  
671 Verheyen, K., & Hermy, M. (2007). Management driven changes (1967–2005)

672 in soil acidity and the understorey plant community following conversion of a  
673 coppic-with-standards forest. *Forest Ecology and Management*, 241, 258–271.

674 Wright, D. H., & Reeves, J. H. (1992). On the meaning and measurement of nestedness  
675 of species assemblages. *Oecologia*, 92(3), 416–428.

676 Yamamoto, S., Masuda, R., Sato, Y., Sado, T., Araki, H., Kondoh, M., ... Miya, M.  
677 (2017). Environmental DNA metabarcoding reveals local fish communities in a  
678 species-rich coastal sea. *Scientific Reports*, 7, 40368.

679 Yamanaka, H., Motozawa, H., Tsuji, S., Miyazawa, R. C., Takahara, T., & Minamoto,  
680 T. (2016). On-site filtration of water samples for environmental DNA analysis to  
681 avoid DNA degradation during transportation. *Ecological Research*, 31(6), 963–  
682 967.

683

684 Table 1 Indicator taxa analysis for the taxa had significantly different frequency  
 685 between eDNA metabarcoding and visual/capture methods ( $P < 0.05$ ). Best means  
 686 preferred methods. P-values was calculated with 999 permutations after Sidak's  
 687 correction of the multiple testing.  
 688

| Taxa                              | P-value for eDNA metabarcoding | P-value for visual and capturing survey | best               | P-value for multiple testing |
|-----------------------------------|--------------------------------|-----------------------------------------|--------------------|------------------------------|
| <i>Anguilla japonica</i>          | 0.001                          | 1.000                                   | eDNA metabarcoding | 0.002                        |
| <i>Oncorhynchus masou</i>         | 0.001                          | 1.000                                   | eDNA metabarcoding | 0.002                        |
| <i>Oncorhynchus mykiss</i>        | 0.016                          | 1.000                                   | eDNA metabarcoding | 0.032                        |
| <i>Cyprinus carpio</i>            | 0.001                          | 1.000                                   | eDNA metabarcoding | 0.002                        |
| <i>Silurus asotus</i>             | 0.003                          | 1.000                                   | eDNA metabarcoding | 0.006                        |
| <i>Misgurnus anguillicaudatus</i> | 0.009                          | 1.000                                   | eDNA metabarcoding | 0.018                        |

689

690

691

692 **Figure legends**

693

694 Figure 1. Venn diagrams for the number of detected taxa. eDNA metabarcoding  
695 (eDNA, blue) and visual/capture methods (V/C, red) in each site of the five study river  
696 systems. The bottom diagrams (All) showed the number of detected taxa in the river  
697 systems. The numbers represent the number of taxa.

698

699 Figure 2. Nonmetric multidimensional scaling (NMDS) ordination with Jaccard index  
700 (with Raup-Crick index in Fig. S4). Fish communities evaluated by the study rivers  
701 (shape) and each segment (colored) of the river. MDS stress was 0.158.

702

703 Figure 3. Pairwise effect size (SES, standard effect size). Comparison between  
704 community nestedness and species turnover between the communities detected by  
705 eDNA metabarcoding and visual/capture methods. Error bars indicate 95% confidence  
706 interval. The horizontal dotted line represents  $SES = 0$ , indicating a non-significant  
707 effect.

708

709 Figure 4. Effect size (SES, standard effect size). a) community nestedness and b)  
710 species turnover SES among the segment communities evaluated by eDNA  
711 metabarcoding and visual/capture methods. The error bars indicate 95% confidence  
712 interval. The horizontal dotted line represents  $SES = 0$ , indicating non-significant effect.

713

714



715

716

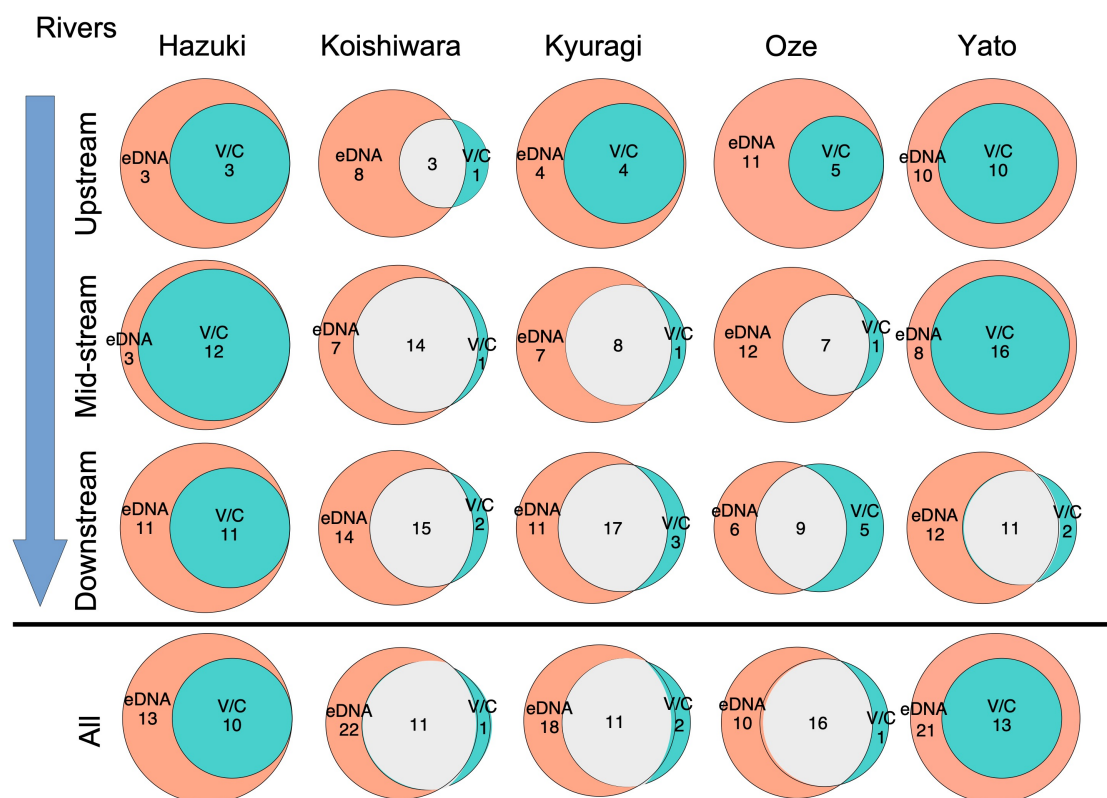

717

718 Figure 1

719

720

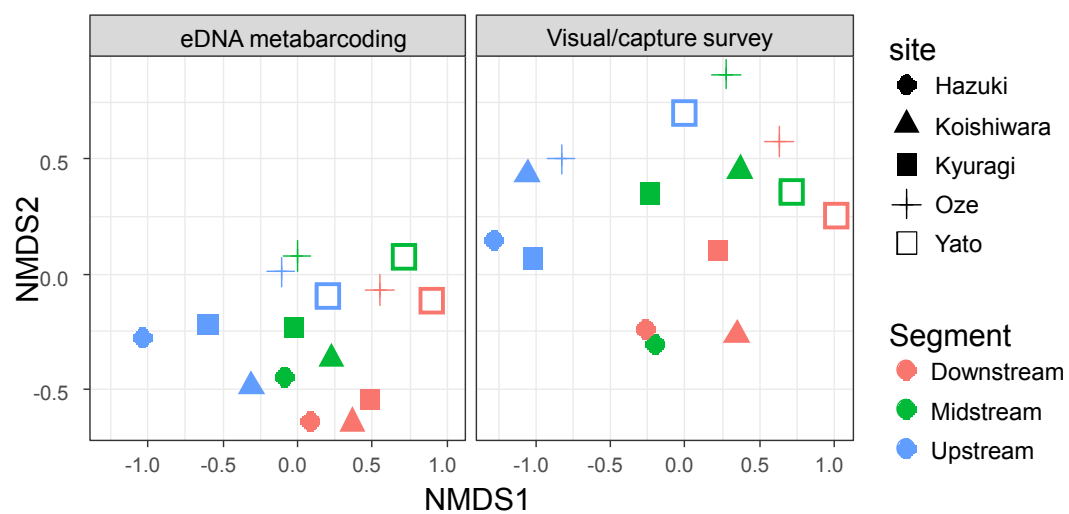

721

722 Figure 2

723

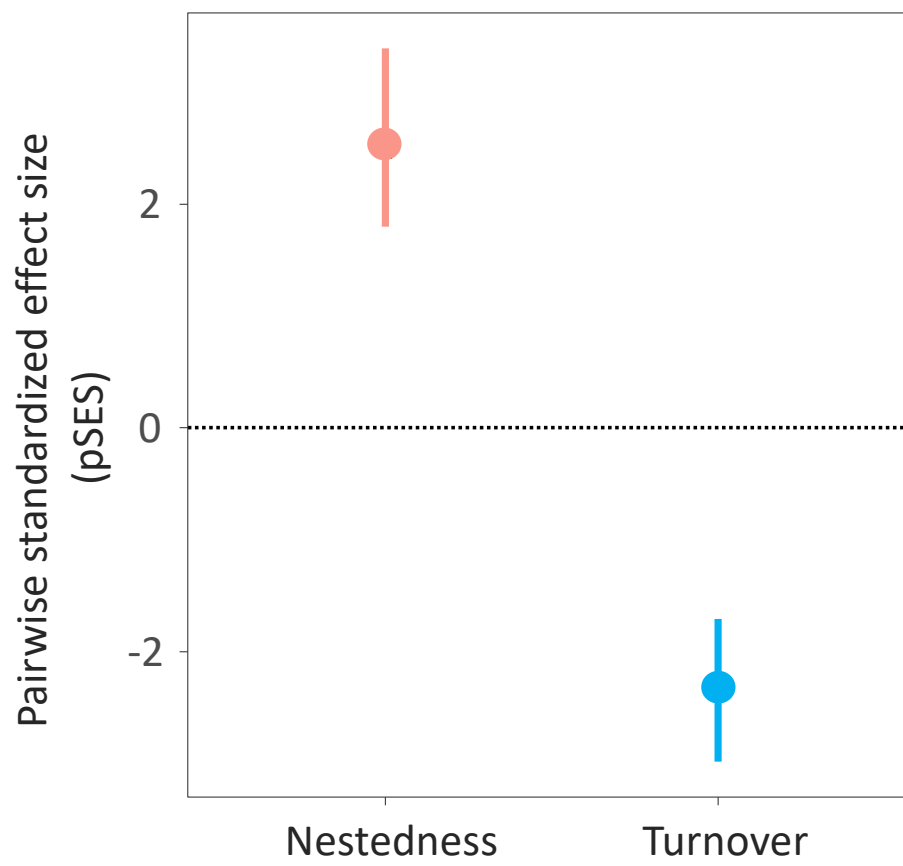

724

725 Figure 3

726

727

728

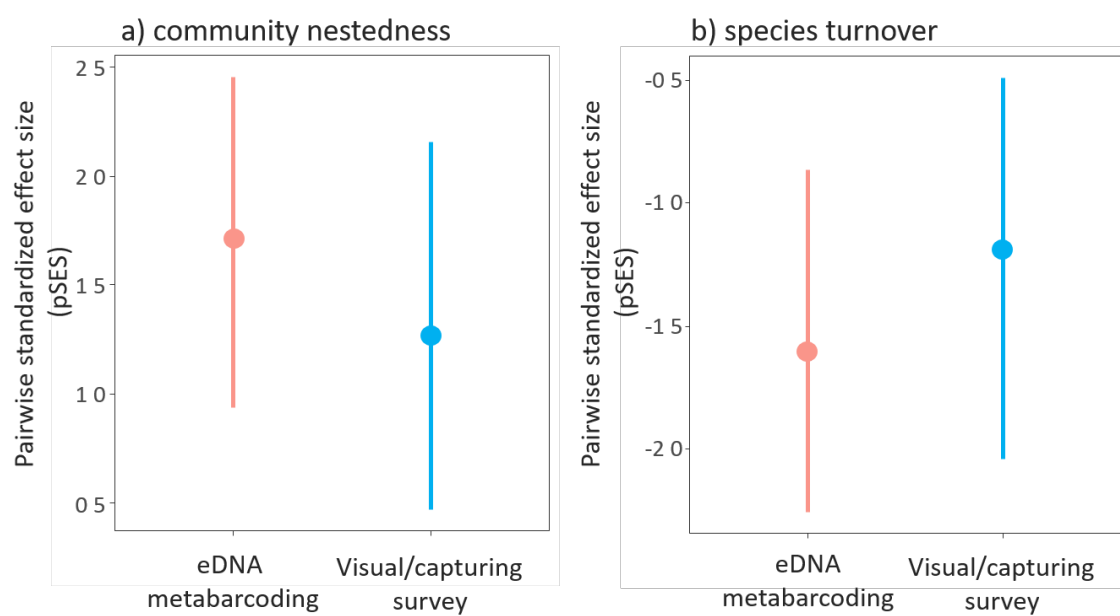

729

730 Figure 4

731
